1 **Title**

2 **Consistency in defence and competitiveness trade-off in a planktonic**  
3 **predator-prey system**

4 **Authors**

5 **Tom Réveillon and Lutz Becks**

6 **Affiliations**

7 *T. Réveillon* (<https://orcid.org/0000-0003-1788-8635>) and *L. Becks* ([https://orcid.org/0000-](https://orcid.org/0000-0002-3885-5253)  
8 [0002-3885-5253](https://orcid.org/0000-0002-3885-5253)), *Aquatic Ecology and Evolution Group, Limnological Institute, Department*  
9 *of Biology, University of Konstanz, Konstanz, Germany.*

10 **Data availability** – Data will be uploaded on the open platform for research KonData from  
11 the University of Konstanz (<https://kondata.uni-konstanz.de>).

12 **Funding** – This work was supported by the German Research Foundation (DFG) to LB (BE  
13 4135/4-2) as part of the priority program “Flexibility Matters: Interplay between Trait Diversity  
14 and Ecological Dynamics Using Aquatic Communities as Model Systems – DynaTrait” (SPP  
15 1704).

16 **Author contributions** – TR and LB compiled the first theoretical ideas. TR and LB  
17 designed the experiments. TR conducted the laboratory experiments and statistical analyses  
18 with the assistance of LB. TR wrote the initial drafts of the manuscript. TR and LB wrote the  
19 final version of the manuscript.

20 **Acknowledgements** – We are thankful to U. Gaedke for the review of an earlier version of  
21 the manuscript, to E. Ehrlich for advice on data analysis, and to R. Hermann and R. Lambrecht  
22 for the theoretical and practical contributions to the experiments.

23 **Conflicts of interest** – The authors have no conflicts of interest to declare.

24 **Word count** – Main manuscript: 9829 words. Supplementary materials: 3044 words.

25

## 26 **Abstract**

27 1. Predator-prey interactions play a central role in community dynamics and thus energy and  
28 matter transfers in food webs. Intraspecific variation in traits and particularly in trait  
29 combinations involved in trade-offs can alter predator-prey interactions but the underlying  
30 mechanisms governing these interactions are still unclear. Quantifying the relevant traits  
31 forming trade-off relationships and how these traits determine prey and predator fitness remains  
32 a major challenge, even for a single species. Here, we measured multiple traits related to  
33 defensive and competitive abilities to investigate the intraspecific trade-off between defence  
34 and competitiveness in 6 different strains of the green alga *Chlamydomonas reinhardtii* exposed  
35 to predation by the rotifer *Brachionus calyciflorus* and examine the consistency of the trait  
36 relationships and its consequence for the predator.

37 2. We found significant differences in defence and competitiveness traits that were used to  
38 categorized prey strains as defended against predation and poor competitors, undefended  
39 against predation and good competitors, or intermediate in both traits. Furthermore, we found  
40 that the different morphological and trophic traits related to defence and competitiveness of  
41 prey strains were negatively correlated. The position of prey strains in trait space were  
42 consistent independent of the defence and competitiveness trait considered. As we compared  
43 trait differences between prey strains coming from environments where selection has favoured  
44 one trait or the other, these negative correlations strongly suggested the presence of a trade-off  
45 between defence and competitiveness.

46 3. Our study represents the first empirical evidence of the consistency in the expression of a  
47 defence-competitiveness trade-off at the intraspecific level. Assessing the relation between  
48 relevant traits and trade-offs and understanding how it translates into fitness of prey and

49 predator allows improving general theory on the outcomes of predator-prey interactions and  
50 ecosystem processes.

51 **Keywords:** fitness, defence, competitiveness, trade-off, predator-prey interactions, green algae,  
52 rotifers

53

## 54 **Introduction**

55 Trophic interactions between predator and prey determine the functioning of ecosystems  
56 through their influence on population dynamics (Hudson et al. 2002; Jonsson et al. 2010), food  
57 webs (Brose et al. 2005; Petchey et al. 2008), community dynamics (Murdoch et al. 2003;  
58 Thébault and Loreau 2005) as well as fluxes of energy and matter in ecosystems (Rip and  
59 McCann 2011; Gilbert et al. 2014). For example, phytoplankton are the largest group of primary  
60 producers responsible for the acquisition and assimilation of inorganic compounds (Reynolds  
61 2006; Halsey and Jones 2015) and herbivorous zooplankton are among the most abundant  
62 consumers of phytoplankton in aquatic ecosystems (Kiørboe 2008), transferring basal  
63 autotrophic production to higher trophic levels such as invertebrates and fishes. Thus, the  
64 trophic interaction between phytoplankton and zooplankton contributes significantly to food  
65 web dynamics and ecosystem production (Quintana et al. 2015, Turner 2015). The outcome of  
66 trophic interactions and the consequences on population dynamics are primarily determined by  
67 combinations of traits driving the performance of the interacting individuals (Colina et al.  
68 2016). Understanding the mechanisms linking traits of phytoplankton and zooplankton to the  
69 strength of trophic interactions is therefore crucial for assessing food web functioning  
70 (Reynolds 2006; Litchman and Klausmeier 2008; Litchman et al. 2010; 2013; Edwards et al.  
71 2013) and energy transfers between trophic levels (Turner 2002; Sommer 2008).

72 Traits involved in defence against predation (i.e., *sensu* grazing protection) and  
73 competitiveness (i.e., *sensu* reproduction) of phytoplankton are intimately related to the fitness  
74 of individuals and mediate trophic interactions (Colina et al. 2016). These trophic traits are  
75 often closely linked to structural traits (i.e., morphological and physiological traits). In  
76 particular, phytoplankton organisms exhibit a large variety of defence mechanisms against  
77 zooplankton grazing (Pančić and Kiørboe 2018; Lürding 2020), which interfere with different

78 steps of the predation sequence by preventing the encounter or the consumption by the predator  
79 (Weiss et al. 2012; Bateman et al. 2014), having either an inducible or a constitutive expression  
80 (Van Donk et al. 2011). These traits affect zooplankton predation by reducing prey detection  
81 and consumption (Rall et al. 2012) through altered attack rates (i.e., the rate of prey encounter)  
82 and the handling times (i.e., the time spent on prey manipulation) and thus have consequences  
83 on the fitness of zooplankton (Lürling and Van Donk 1996). Defence traits of phytoplankton  
84 include cell size (Long et al. 2007; Friedrichs et al. 2013), cell shape (Hessen and Van Donk  
85 1993), cell structure (Pondaven et al. 2007; Harvey et al. 2015), life-history stage (Kolb and  
86 Strom 2013), and the formation of colonies composed of cells bound by an extracellular matrix  
87 (Verschoor et al. 2004; Bernardes et al. 2021). For instance, colony formation induces an increase  
88 in handling time, which causes important reductions in ingestion and reproduction of  
89 zooplankton (Gibert and Brassil 2014).

90         Because organisms cannot optimize all functions contributing to fitness simultaneously  
91 due to structural (i.e., genetic) and/or functional (i.e., energetic) constraints, trade-off  
92 relationships between traits can emerge (Stearns 1989). In particular, trade-offs between  
93 defence and competitiveness are common in phytoplankton (Yoshida et al. 2004; Becks et al.  
94 2010; Sunda and Hardison 2010; Kasada et al. 2014; Ehrlich et al. 2017; Pančić and Kiørboe  
95 2018; Cadier et al. 2019) and may explain the diversity of defence strategies exhibited by  
96 phytoplankton (Agrawal 1998; Strauss et al. 2002). Competitiveness costs can arise from the  
97 energy investment in expressing anti-grazing defences due to a reduced ability to acquire and  
98 utilize resources (Litchman et al. 2007; Halsey and Jones 2015). Indeed, cell colonies have  
99 often higher energy requirements and lower resource acquisition rates (Lürling and Van Donk  
100 2000), which can cause a reduction in reproduction (Smith 2014). Therefore, trade-off  
101 relationships between defence and competitiveness traits can affect trophic interactions by  
102 influencing phytoplankton exploitation and zooplankton growth as well as phytoplankton

103 growth (Litchman et al. 2007; 2015; Ehrlich et al. 2020). Exploring trade-off relationships  
104 between defensive and competitive abilities of phytoplankton is thus essential for understanding  
105 ecological processes in planktonic communities.

106 Trade-offs between defence and competitiveness have strong implications for  
107 phytoplankton communities (Ehrlich et al. 2020) and there is increasing evidence emphasizing  
108 the significance of such trade-offs for trophic interactions and population dynamics (Yoshida  
109 et al. 2003; 2004; Becks et al. 2010; Yamamichi et al. 2011; Kasada et al. 2014). Despite the  
110 importance of trade-offs, there are few data available and the existing data should be interpreted  
111 with caution. First, some studies assume fixed traits and trade-offs at the species or genus level  
112 (Bruggeman 2011), but this assumption has been shown to be invalid and intraspecific variation  
113 in traits can affect trophic interactions (Yoshida et al. 2004; Becks et al. 2010). Second,  
114 defensive and competitive abilities of phytoplankton can be assessed by multiple traits  
115 (Fleischer et al. 2018) and the relevant traits constituting trade-off are often unknown. Studies  
116 use different traits as proxies for defence and competitiveness and thus different trait  
117 correlations. This makes comparisons of trade-offs across studies difficult and raises the  
118 question of whether different proxies can be used for studying the outcome of trophic  
119 interactions. Third, negative correlations might not reflect a causal trade-off relationship due to  
120 confounding factors when traits are independently affected by the same environmental  
121 conditions (Edwards et al. 2011). One approach to examine the presence of trade-offs is to  
122 compare trait differences between individuals originating from the same environment for which  
123 selection favoured one trait and look for constraints on the other trait (Fry 2003; Fuller et al.  
124 2005).

125 Determining the most suitable traits describing defence-competitiveness trade-offs and  
126 information on the consistency of the trade-off relationships independent of the traits can give  
127 important insights on the role for these trade-offs for energy transfers and population dynamics

128 in food webs. Here, we investigate the intraspecific trade-off relationship between anti-grazing  
129 defence and competitiveness traits for 6 different prey genotypes (hereafter: strains) of the green  
130 alga *Chlamydomonas reinhardtii* and evaluate the consistency of trait correlation between  
131 defensive and competitive abilities of these strains (i.e., the consistent position of strains in trait  
132 spaces). Furthermore, we link these traits and the resulting trade-offs to the trophic interaction  
133 with the rotifer predator *Brachionus calyciflorus*. Algal strains were isolated from a previous  
134 experimental evolution study and differed in their morphologies (i.e., single or colonial cells)  
135 as well as defence (i.e., measured as reduction in predator growth rate) and growth (i.e.,  
136 measured as strain growth rate; Bernardes et al. 2021). We measured prey defence against a  
137 predator by assessing the functional response (i.e., the ingestion rate as a function of prey  
138 density) and the growth rate of *B. calyciflorus* on prey strains. We measured prey  
139 competitiveness by assessing the maximum growth rate and the half-saturation constant for  
140 nitrate. We also measured a set of size and shape features on strains to establish a better link  
141 between the prey morphology and the trophic interaction with the predator. We then used  
142 parameters and rates derived from the experiments to construct and compare multiple defence-  
143 competitiveness trait spaces.



## 144 **Material and methods**

145 We used 6 strains of the green alga prey *Chlamydomonas reinhardtii* (Dang 1888) derived from  
146 isolates which were originally obtained from the Chlamydomonas Resource Center (University  
147 of Minnesota, USA). Isolates were selected from monoclonal naive ancestors (i.e., no encounter  
148 with predation for thousands of generations) that were exposed or not to grazing pressure by  
149 the rotifer *Brachionus calyciflorus* for 6 months (~500 generations) in semi-continuous cultures  
150 (Bernardes et al. 2021). For the present study, a single colony from each strain was sampled  
151 from solid media and transferred to tissue culture flasks filled with 50 mL of sterile growth  
152 medium with 800  $\mu\text{mol NO}_3^- \text{L}^{-1}$ . Flasks were exposed to continuous light (200  $\mu\text{mol photon}$   
153  $\text{m}^{-2} \text{sec}^{-1}$ ) and shaking (120 rpm) at 20°C for 2 weeks before assays, which allowed the cultures  
154 to reach relatively high densities. We used a clonal line of the rotifer predator *Brachionus*  
155 *calyciflorus* Pallas (Pallas 1766) derived from an isolate sampled in Milwaukee harbor (Bennett  
156 and Boraas 1989). This clonal line lost the ability to reproduce sexually and the possibility for  
157 evolutionary changes through genetic mixing (Fussmann et al. 2003). Rotifer stocks were kept  
158 in 1 L bottles filled with sterile growth medium with 800  $\mu\text{mol NO}_3^- \text{L}^{-1}$  (Barreiro and Hairston  
159 2013) and fed with the nutrient-rich chlorophyte alga *Monoraphidium minutum* (University of  
160 Göttingen, Germany).

### 161 *Predator functional response*

162 Prior to the experiment, *C. reinhardtii* strains were sampled from culture flasks and centrifuged  
163 at 2000 rpm for 10 min at 20 °C. The culture medium was removed and the pellets were  
164 suspended in nitrate-free medium at a density of  $1 \times 10^6$  cells  $\text{mL}^{-1}$  for 24 h to significantly  
165 slow down algal growth during the exposure to predation. At the start of the experiment, strain  
166 densities were estimated and diluted to 10 different cell densities ( $1 \times 10^4$  to  $1 \times 10^6$  cells  $\text{mL}^{-1}$ ).  
167 These dilutions were made in 2 mL tubes by mixing the strain solutions with nitrate-free

168 medium and 200  $\mu\text{L}$  were transferred into wells of 96 well plates. The experimental design  
169 included 3 replicates per cell density for each strain for the control treatment without exposure  
170 to predation to estimate the initial densities in the wells and for the predation treatment to  
171 estimate the final densities after exposure to predation. For the predation treatment, 5 adult *B.*  
172 *calyciflorus* were introduced per well and allowed to feed for 8 h at 20°C under continuous  
173 light. Afterwards, cells were fixated by adding 10  $\mu\text{L}$  of Lugolsche solution. Plates were stored  
174 at 4°C in the dark for 24 h to allow cells to settle to the bottom of the wells. Initial and final cell  
175 densities were acquired by taking 21 images per well using a Cy5 filter set and the  
176 autofluorescence of the algal cells (642 nm) under a 10x magnification using a high content  
177 microscope (ImageXpress<sup>®</sup> Micro 4 High-Content Imaging System). Images were analyzed and  
178 cell densities were calculated using a custom module within the analysis software MetaXpress<sup>®</sup>  
179 High Content Image Acquisition and Analysis (*Supplementary Materials Appendix 1*).  
180 Ingestion rates were calculated as  $I = (D_I - D_F) / (t \times R)$ , where  $D_I$  is the mean initial cell density  
181 of replicate wells from the control treatment ( $\text{cells mL}^{-1}$ ),  $D_F$  is the final cell density of each  
182 well from the predation treatment ( $\text{cells mL}^{-1}$ ),  $t$  is the time of feeding (sec) and  $R$  is the number  
183 of rotifers per well (individuals).

#### 184 *Prey growth*

185 Following the same protocol described above, *C. reinhardtii* strains were concentrated 24 h  
186 prior to the experiment. We measured growth under 9 different nitrate concentrations: 1  
187 intermediate concentrations (100  $\mu\text{mol NO}_3^- \text{L}^{-1}$ ) and 6 low concentrations (1–10  $\mu\text{mol NO}_3^- \text{L}^{-1}$ )  
188 to calculate half-saturation and affinity constants. At the start of the experiment, densities of  
189 strains were estimated and diluted to an initial density of  $1 \times 10^3 \text{ cells mL}^{-1}$ . Growth assays  
190 were made in 96 well plates in a volume of 200  $\mu\text{L}$  by mixing strains (20  $\mu\text{L}$ ) and the different  
191 nitrate-concentrated media (180  $\mu\text{L}$ ). We used a disruptive sampling method: a well plate was  
192 assigned to each day and cells were fixated daily in one of the replicated well plates by adding

193 10  $\mu$ L of Lugol to the wells. The experimental design included 3 technical replicates per nitrate  
194 concentration for each strain. Plates with fixed cells were stored at 4°C in the dark for 24 h to  
195 allow cells to settle to the bottom of the wells. Cell densities were assessed as described above  
196 and growth curves were estimated over 8 days.

#### 197 *Predator growth*

198 *C. reinhardtii* strains were sampled from culture flasks and diluted to  $5 \times 10^5$  cells mL<sup>-1</sup> in 1  
199 mL of a nitrate-free medium in 24 well plates. The nitrate-free medium and the moderate initial  
200 cell density allowed for the control of prey population only by the predator during the  
201 experiment and provided sufficient resource over time for the predator while preventing stress  
202 for the predator due to foraging in saturating resource conditions (personal observation). We  
203 added 2 juveniles and 3 adult rotifers carrying 1 or 2 eggs to the wells to maintain a  
204 homogeneous age structure in the initial population. The experimental design included 5  
205 replicates for each strain. Rotifer individuals were daily counted using a stereomicroscope and  
206 growth curves were estimated over 5 days.

#### 207 *Prey morphology*

208 To assess the variation in morphological traits among and within *C. reinhardtii* strains, 100  $\mu$ L  
209 was sampled from the culture flasks of *C. reinhardtii* strains and transferred into 1.5 mL tubes.  
210 Samples were mixed using a vortex at 1000 rpm and imaged using an imaging flow cytometer  
211 (Amnis<sup>®</sup> ImageStreamX Mk II). A collection of 5000 images was acquired for each strain with  
212 a 20X magnification using the red channel (642 nm) and the autofluorescence of algal cells for  
213 image acquisition. A selection of 40 morphological features (Tab. S1) was calculated per image  
214 using a related analysis software (Amnis IDEAS<sup>®</sup>, see *Supplementary Materials Appendix 2*).  
215 We used these features to characterize morphological differences between strains (i.e., inter-  
216 strain clustering) and within strains (i.e., intra-strain clustering). Cell morphotypes within

217 strains were classified by the number of cells present in each image and divided in 4 categories:  
218 single (1 cell), small clump (2–5 cells), medium clump (6–10 cells) and large clump (10–30  
219 cells). The number of cells was calculated based on a ratio  $A_i / A_r$ , where  $A_i$  is the area of a  
220 single cell or cell clump  $i$  ( $\mu\text{m}^2$ ) and  $A_r$  is the mean area of a single cell ( $136 \mu\text{m}^2$ ) based on a  
221 strain exhibiting only single cells ( $C_{R4}$ ).  $A_r$  was calculated following the removal of values  
222 below and above the confidence interval boundaries (CI<sub>2.5%</sub>–CI<sub>97.5%</sub>).

### 223 *Statistical analyses*

224 To estimate predator functional responses, the mean ingestion rate of the 3 replicates was  
225 calculated over the range of cell densities for each *C. reinhardtii* strain. Following the disc  
226 equation (Holling 1959), functional responses were expressed as mean ingestion rate of the  
227 predator ( $I_i$ ) as a function of prey densities ( $A_i$ ) and predator ingestion parameters. A selection  
228 of 4 functional response models were compared to assess the best representation of data (Tab.  
229 S1). We chose the widespread Holling types I, II and III models (Holling 1965) along with the  
230 Ivlev type II model (Ivlev 1955). The Holling type I represents a linear increase of ingestion  
231 rate while the Holling type II and type III exhibit a non-linear increase of ingestion rate, which  
232 reaches a saturation at high prey density. The Ivlev type II is considered equivalent to the  
233 Holling type II but defined with different functional parameters. We fitted the 4 functional  
234 response models for each strain using non-linear least squares regressions and compared them  
235 with likelihood ratio tests (Tab. S2). We then selected the best fitting strain-specific models to  
236 estimate ingestion rate over prey densities, which was the Holling type II model (Eq. 1):

$$237 \quad I_i = \frac{a_i A_i}{1 + a_i h_i A_i} \quad (\text{Eq. 1})$$

238 where  $a_i$  is the attack rate of the predator on strain  $i$  ( $\text{mL sec}^{-1}$ ),  $h_i$  is the handling time of the  
239 predator on strain  $i$  ( $\text{sec}^{-1}$ ) and  $A_i$  is the cell density of strain  $i$  ( $\text{cells mL}^{-1}$ ). Using the fitted

240 parameters from the previous model (Eq. 1), ingestion rates were predicted over a larger range  
241 of cell densities than in the experiment (up to  $1.5 \times 10^6$  cells mL<sup>-1</sup> with a 0.1 step) to better fit  
242 the functional response curvatures at high cell densities (i.e., ingestion saturation) and obtain  
243 comparable curves among strains. Then, we estimated strain-specific attack rates as the slopes  
244 of ingestion rate at low prey densities ( $5 \times 10^5$  cells mL<sup>-1</sup>) and strain-specific handling times as  
245 the maximum ingestion rates at high prey densities ( $1.5 \times 10^6$  cells mL<sup>-1</sup>). To further describe  
246 anti-grazing defences of prey strains, we also estimated strain-specific detection and ingestion  
247 probabilities by the predator as proposed by Ehrlich and Gaedke (2018) following a modified  
248 expression of Holling type II model (Eq. 2):

$$249 \quad I_i = \frac{ad_i p_i A_i}{1 + ah d_i A_i} \quad (\text{Eq. 2})$$

250 where  $a$  is the species attack rate of the predator (mL sec<sup>-1</sup>),  $h$  is the species handling time of  
251 the predator (sec<sup>-1</sup>),  $d_i$  is the detection probability of strain  $i$  (i.e., probability for the predator to  
252 detect the prey),  $p_i$  is the ingestion probability (i.e., probability for the predator to consume the  
253 detected prey) and  $A_i$  is the cell density of strain  $i$  (cells mL<sup>-1</sup>) (*Supplementary Materials*  
254 *Appendix 3*).

255 To estimate prey growth rates, the mean cell density of the 3 replicates was calculated  
256 over the range of nitrate concentrations for each *C. reinhardtii* strain and day. A selection of 5  
257 growth models were compared following the approach of Paine et al. (2012) to assess the best  
258 representation of data (Tab. S2). We chose 2 non-asymptomatic models which assume of an  
259 unlimited cell growth over time: a linear model, representing a constant increase in cell density  
260 over time and an exponential model for a disproportional increase in cell density over time. We  
261 also chose 3 asymptomatic models which make the assumption of a limited cell growth with a  
262 maximum cell density reached over time: a monomolecular model describing a vertical increase  
263 in cell density which reaches rapidly an horizontal asymptote (i.e., maximum population cell

264 density), a logistic model describing a slow increase in cell density with an inflection point (i.e.,  
265 time point for maximum growth rate) around 50% of the asymptotic cell density and a  
266 Gompertz model describing a rapid increase in cell density with an inflection point around 37%  
267 of the asymptotic cell density (Heinen 1999). We fitted the 5 growth models to each  
268 combination of strain and nitrate treatment using non-linear least squares regressions on log-  
269 transformed cell densities and we compared them with likelihood ratio tests (Tab. S3). We then  
270 selected the best fitting strain-specific model to estimate cell density over time, which was the  
271 logistic model (Eq. 3):

$$272 \quad D_i = \frac{b_i K_i}{b_i + (K_i - b_i)e^{-r_i t}} \quad (\text{Eq. 3})$$

273 where  $b_i$  is the initial cell density of strain  $i$  (cells mL<sup>-1</sup>),  $K_i$  is the asymptotic cell density of  
274 strain  $i$  (cells mL<sup>-1</sup>),  $r_i$  is the intrinsic growth rate of strain  $i$  (cells day<sup>-1</sup>) and  $t$  is the time (day<sup>-1</sup>).  
275 Using the fitted parameters from the previous model (Eq. 3), cell densities were predicted  
276 over a larger range of days than in the experiment (up to 10 days with a 0.1 step) to better fit  
277 the growth curvatures at high cell densities (i.e., growth saturation). *Per capita* growth rates  
278 were also calculated for each strain and nitrogen concentration using linear regressions over the  
279 full time series (i.e., over 10 days) to obtain the overall *per capita* growth rate ( $G$ ) and for each  
280 3 consecutive time steps (i.e., each 0.3 days) to find the maximum per capita growth rate ( $G_m$ ).  
281 Then, we estimated strain-specific half-saturation and affinity constants for nitrate using non-  
282 linear least squares regressions on the Monod equation (Monod 1950):

$$283 \quad G_i = G_{mi} \frac{N}{K_i + N} \quad (\text{Eq. 4})$$

284 where  $G_i$  is the overall *per capita* growth rate of strain  $i$  (day<sup>-1</sup>)  $G_{mi}$  is the maximum *per capita*  
285 growth rate of strain  $i$  (day<sup>-1</sup>),  $K_i$  is the half-saturation constant of strain  $i$  (μmol NO<sub>3</sub><sup>-</sup> L<sup>-1</sup>) and  
286  $N$  is nitrate concentration (μmol NO<sub>3</sub><sup>-</sup> L<sup>-1</sup>). Affinity constants were calculated as  $A_i = G_{mi} / K_i$ ,

287 where  $G_{mi}$  is the maximum *per capita* growth rate of strain  $i$  ( $\text{day}^{-1}$ ) among all nitrate  
288 concentrations and  $K_i$  is the half-saturation constant of strain  $i$  ( $\mu\text{mol NO}_3^- \text{L}^{-1}$ ).

289 To estimate predator growth rates, the mean *B. calyciflorus* density of the 5 replicates  
290 was calculated for each *C. reinhardtii* strain and day. A selection of 4 growth models were  
291 compared to assess the best representation of data (Tab. S3) depending on the response of the  
292 rotifer populations to different prey strains. We chose a linear model, an exponential model, a  
293 logistic model (Eq. 3) and a mortality model (Eq. 5) describing an increase or a stabilization  
294 and then a decrease in rotifer density (Malerba et al. 2018). We fitted the 4 growth models using  
295 non-linear least squares regressions on rotifer densities and we compared them with likelihood  
296 ratio tests (Tab. S4). We then selected the best fitting strain-specific model to estimate rotifer  
297 density over time, which was the mortality model for strains  $C_{R1}$ ,  $C_{R2}$ ,  $C_{R3}$  and  $C_{R4}$  (Eq. 3) and  
298 the logistic model for strains  $C_{R6}$  and  $C_{R7}$  (Eq. 5):

$$299 \quad D_i = K_i e^{m_i(t-t_{mi}) - \frac{m_i}{r_i}(1-e^{-r(t-t_{mi})})} \quad (\text{Eq. 5})$$

300 where  $r_i$  is the intrinsic growth rate of rotifer for strain  $i$  ( $\text{ind day}^{-1}$ ),  $K_i$  is the asymptotic rotifer  
301 density for strain  $i$  ( $\text{ind mL}^{-1}$ ),  $m_i$  is the decreasing slope following maximum rotifer density for  
302 strain  $i$  ( $\text{ind day}^{-1}$ ),  $t$  is the time ( $\text{day}^{-1}$ ) and  $t_{mi}$  is the time for maximum intrinsic growth rate of  
303 rotifer for strain  $i$  ( $\text{day}^{-1}$ ). *Per capita* growth rates were also calculated for each strain using  
304 linear regressions over the full time series (i.e., over 5 days).

305 A principal components analysis (PCA) was conducted on the 40 morphological  
306 features estimated on collections of individual cell images. Features chosen for this analysis  
307 were divided in 2 categories: cell size for traits over 1 dimension and cell shape for traits over  
308 2 dimensions. The PCA was run on the image collections containing 30000 images (5000  
309 images per strain) and the 2 first dimensions explaining most of the variance in the data were  
310 selected ( $D_1 = 46.5\%$ ,  $D_2 = 19.9\%$ ). Coefficients of variation (CV) were calculated for each of

311 the 40 features for each strain as  $CV = (sd_x / m_x) \times 100$ , where  $sd_x$  and  $m_x$  are the standard  
312 deviation and the mean of feature  $x$ , respectively. In addition, pairwise correlations between the  
313 relevant features Area (size) and Circularity (shape) according to contributions to the PCA  
314 dimensions were performed using linear regressions and Pearson correlation tests. Statistical  
315 differences in these two relevant morphological features among strains and among morphotypes  
316 within strains were also tested using Kruskal-Wallis and Dunn post-hoc tests.

317 Statistical analyses were computed using the R software v.4.0.4 (R Development Core  
318 Team 2020). The principal components analysis was computed using the *PCA* function from  
319 the ‘FactoMineR’ R package. Linear regressions and non-linear least squares regressions were  
320 computed using the *lm* and *nls* functions from the ‘lme4’ R package. Models were compared  
321 using the *lrt* function from the ‘lmtest’ R package and significance was obtained using the  
322 *anova* function from the ‘stats’ R package.



## 323 **Results**

### 324 *Predator functional response*

325 The defence of *C. reinhardtii* strains was defined based on the ingestion rate of the predator *B.*  
326 *calyciflorus* and ranged from defended (low ingestion) to undefended (high ingestion). The  
327 comparison of functional response models revealed that the ingestion rates of *B. calyciflorus*  
328 on *C. reinhardtii* strains were better described by non-linear saturating models (Tab. S1, Fig.  
329 S1a). *B. calyciflorus* ingestion rates differed among strains and depended on cell densities (Fig.  
330 1a). Strains C<sub>R1</sub>, C<sub>R2</sub> and C<sub>R3</sub> were classified as defended due to the low maximum ingestion  
331 rates exhibited by the predator (e.g., C<sub>R1</sub>:  $0.43 \pm 0.09$  and C<sub>R2</sub>:  $0.49 \pm 0.11$  cells sec<sup>-1</sup> mL<sup>-1</sup> ind<sup>-1</sup>)  
332 while intermediate strains C<sub>R6</sub> and C<sub>R7</sub> were considered as due to the moderate maximum  
333 ingestion rates exhibited by the predator (e.g., C<sub>R6</sub>:  $1.32 \pm 0.10$  and C<sub>R7</sub>:  $1.19 \pm 0.12$  cells sec<sup>-1</sup>  
334 mL<sup>-1</sup> ind<sup>-1</sup>). In contrast, strain C<sub>R4</sub> was classified as undefended due to the high maximum  
335 ingestion rates exhibited by the predator ( $3.41 \pm 0.26$  cells sec<sup>-1</sup> mL<sup>-1</sup> ind<sup>-1</sup>), which was  
336 characterized by a saturation plateau appearing at very high prey density ( $> 1.5 \times 10^6$  cells mL<sup>-1</sup>)  
337 ). These differences in the shapes of the functional responses were confirmed by a large  
338 variation in functional parameters: *B. calyciflorus* expressed lower attack rates (e.g., C<sub>R1</sub>:  $0.06$   
339  $\pm 0.01$  against C<sub>R4</sub>:  $0.46 \pm 0.07$  mL sec<sup>-1</sup>) but higher handling times (e.g., C<sub>R1</sub>:  $2.84 \pm 0.36$   
340 against C<sub>R4</sub>:  $0.35 \pm 0.02$  sec<sup>-1</sup>) on defended strains compared to undefended strains. Moreover,  
341 we calculated detection and ingestion probabilities as proxies for anti-grazing defences of  
342 strains (Tab. 1). Defended strains had variable detection probabilities (e.g., C<sub>R1</sub>: 0.41 and C<sub>R2</sub>:  
343 1.00) but consistently low ingestion probabilities (e.g., C<sub>R1</sub>: 0.12 and C<sub>R2</sub>: 0.16) whereas  
344 undefended strains also had variable detection probabilities (e.g., C<sub>R4</sub>: 0.44 and C<sub>R6</sub>: 0.79) but  
345 consistently high ingestion probabilities (e.g., C<sub>R4</sub>: 1.00 and C<sub>R6</sub>: 0.45).

### 346 *Prey growth*

347 The competitiveness of *C. reinhardtii* strains was classified based on the growth rate and ranged  
348 from non-competitive (low growth) to competitive (high growth). The comparison of growth  
349 models revealed that the growth curves of *C. reinhardtii* strains were better described by a non-  
350 linear logistic model (Tab. S2, Fig. S1b). Growth rates differed among *C. reinhardtii* strains  
351 and showed the same grouping as for ingestion rate (Fig. 1b). Defended strains C<sub>R1</sub>, C<sub>R2</sub> and  
352 C<sub>R3</sub> were classified as non-competitive due to the low maximum cell densities (e.g., C<sub>R2</sub>:  $0.76$   
353  $\pm 0.27$  and C<sub>R3</sub>:  $0.64 \pm 0.28 \cdot 10^5$  cells mL<sup>-1</sup>) and low *per capita* growth rates (e.g., C<sub>R2</sub>:  $0.08 \pm$   
354  $0.01$  and C<sub>R3</sub>:  $0.09 \pm 0.01$  day<sup>-1</sup>) while intermediate and undefended strains C<sub>R4</sub>, C<sub>R5</sub> and C<sub>R6</sub>  
355 were classified as competitive due to the high maximum cell densities (e.g., C<sub>R4</sub>:  $5.22 \pm 0.95$   
356 and C<sub>R6</sub>:  $5.02 \pm 1.12 \cdot 10^5$  cells mL<sup>-1</sup>) and high *per capita* growth rates (e.g., C<sub>R4</sub>:  $0.21 \pm 0.01$   
357 and C<sub>R6</sub>:  $0.22 \pm 0.02$  day<sup>-1</sup>). Furthermore, nutrient acquisition rates differed among *C.*  
358 *reinhardtii* strains (Fig. 1c). Defended strains had low nitrate affinities (e.g., C<sub>R2</sub>:  $0.15 \pm 0.07$   
359  $\mu\text{mol NO}_3^- \text{L}^{-1} \text{day}^{-1}$ ) and high half-saturation constants (e.g., C<sub>R2</sub>:  $1.43 \pm 0.35 \mu\text{mol NO}_3^- \text{L}^{-1}$ )  
360 whereas undefended strains had high nitrate affinities (e.g., C<sub>R4</sub>:  $1.26 \pm 0.23 \mu\text{mol NO}_3^- \text{L}^{-1} \text{day}^{-1}$ )  
361 and low half-saturation constants (e.g., C<sub>R4</sub>:  $0.37 \pm 0.04 \mu\text{mol NO}_3^- \text{L}^{-1}$ ).

### 362 *Predator growth*

363 Defensive and competitive abilities of *C. reinhardtii* strains had an impact on the population  
364 dynamic of the predator beyond reducing the maximum predator population density (Fig. 1d).  
365 The comparison of growth models revealed that *B. calyciflorus* exhibited a logistic growth in  
366 the presence of intermediate defended strains (C<sub>R6</sub> and C<sub>R7</sub>) but logistic growth followed by a  
367 decline in the presence of defended (C<sub>R1</sub>, C<sub>R2</sub> and C<sub>R3</sub>) and undefended (C<sub>R4</sub>) strains. Defended  
368 strains were associated with lower maximum predator densities (e.g., C<sub>R2</sub>:  $12.26 \pm 0.29$  and  
369 C<sub>R3</sub>:  $12.09 \pm 0.36$  ind mL<sup>-1</sup>) and lower *per capita* growth rate (e.g., C<sub>R2</sub>:  $0.96 \pm 0.18$  and C<sub>R3</sub>:  
370  $0.94 \pm 0.18$  day<sup>-1</sup>) while intermediate defended strains were associated with higher maximum  
371 predator densities (e.g., C<sub>R6</sub>:  $19.51 \pm 0.17$  and C<sub>R7</sub>:  $28.41 \pm 0.91$  ind mL<sup>-1</sup>) and higher *per capita*

372 growth rates (e.g.,  $C_{R6}$ :  $3.33 \pm 0.13$  and  $C_{R7}$ :  $5.47 \pm 0.12 \text{ day}^{-1}$ ). Interestingly, the undefended  
373 strain ( $C_{R4}$ ) was associated with a rapid increase followed by a decrease in predator density  
374 (from  $17.76 \pm 0.84$  to  $13.75 \pm 3.74 \text{ ind mL}^{-1}$ ) and *per capita* growth rate (from  $4.78 \pm 0.13$  to  
375  $-2.43 \pm 0.12 \text{ day}^{-1}$ ), suggesting prey limitation leading to the decline of the predator population.

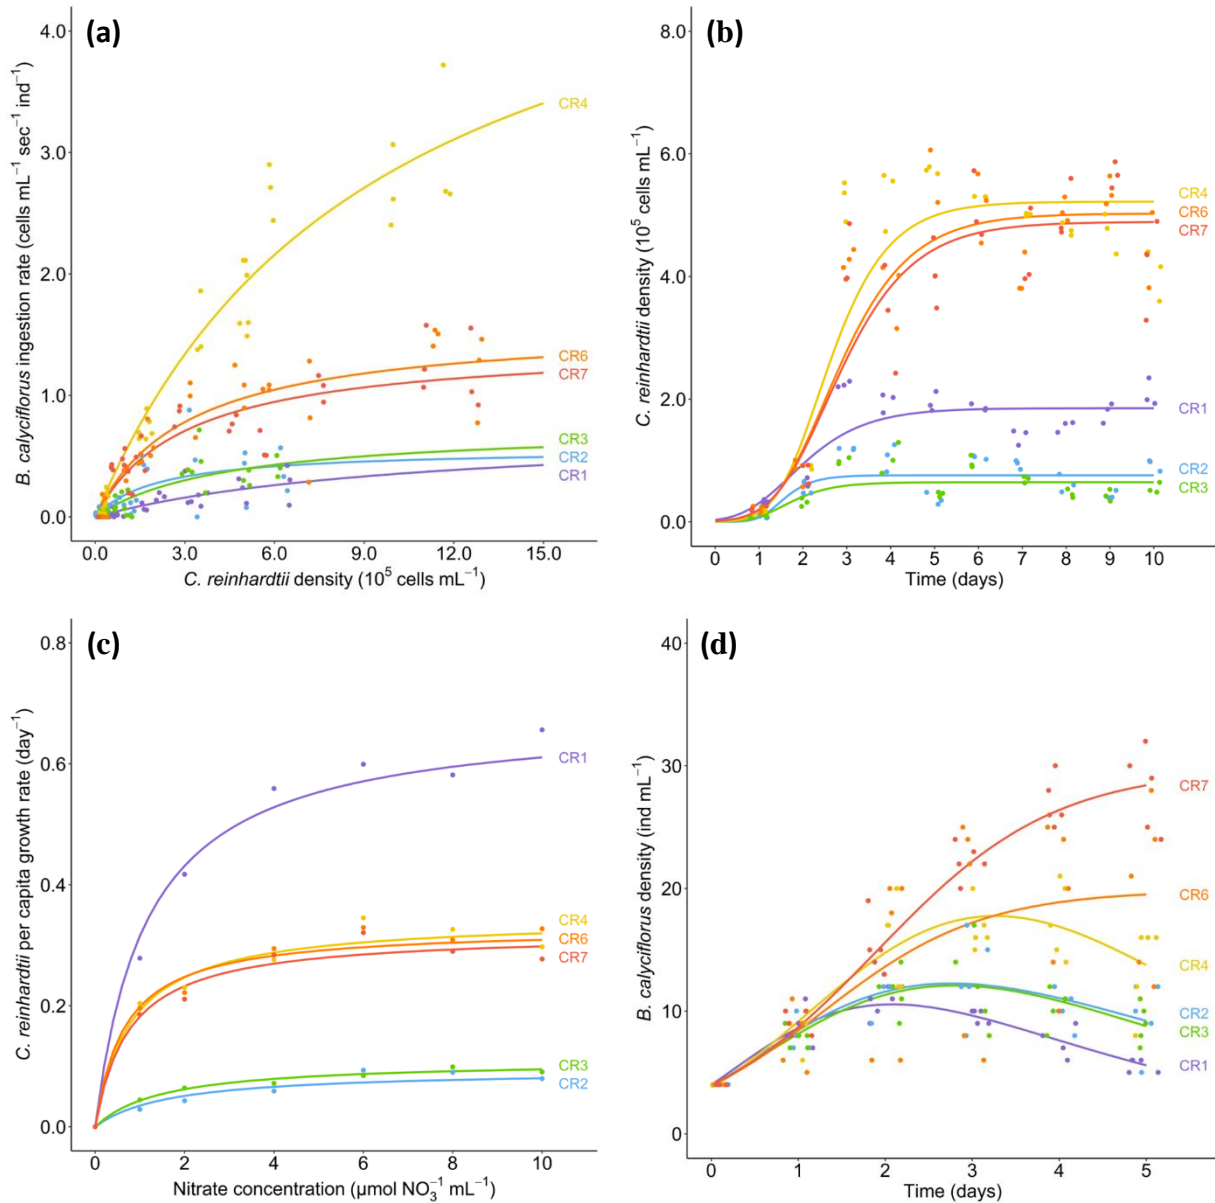

376 **Figure 1:** (a) Functional responses of *B. calyciflorus* showing ingestion rate as a function of  
377 cell density of *C. reinhardtii* strains. Predicted functional response curves (lines) were estimated  
378 from 3 replicates (symbols). (b) Growth curves of *C. reinhardtii* strains shown as cell densities  
379 over time for an intermediate nitrate concentration (100 μmol NO<sub>3</sub><sup>-</sup> L<sup>-1</sup>). Predicted growth  
380 curves (lines) were estimated from 3 replicates (symbols). (c) Growth rate of *C. reinhardtii*  
381 strains over nitrate concentrations (1–10 μmol NO<sub>3</sub><sup>-</sup> L<sup>-1</sup>). All Predicted curves were calculated  
382 using the mean *per capita* growth rate (dots). (d) Growth curves of *B. calyciflorus* feeding on  
383 *C. reinhardtii* strains shown as rotifer densities over time. Predicted growth curves (lines) were  
384 estimated from 3 replicates (symbols).

385 *Prey morphology*

386 To investigate whether the observed differences in defensive and competitive abilities of *C.*  
387 *reinhardtii* strains were related to morphological differences among strains, we analysed  
388 morphological traits in more detail. Strains exhibiting strong clumping morphologies ( $C_{R1}$ ,  $C_{R2}$   
389 and  $C_{R3}$ ) displayed populations covering a larger spectrum of the PCA dimensional space (Fig.  
390 2a) compared to strains exhibiting mostly single cell morphologies ( $C_{R4}$ ,  $C_{R6}$  and  $C_{R7}$ ).  
391 Clumping strains were positively correlated to traits indicating large asymmetric cell aggregates  
392 (e.g., contributions on  $D_1$ : Area = 0.21 and Asymmetry = 0.17, Fig. 2b) and negatively  
393 correlated to traits indicating small symmetric cell sizes (e.g., contributions on  $D_1$ : Circularity  
394 = -0.14 and Sphericity = -0.19, Fig. 2b).

395 Accordingly, relevant morphological features with high contributions in the PCA were  
396 significantly different among strains (e.g., Area: Kruskal-Wallis,  $\chi^2 = 8177.60$ ,  $P < 0.001$ )  
397 Clumping strains exhibited on average larger sizes (e.g., Area  $\pm$  standard deviation:  $C_{R1}$ :  $323 \pm$   
398  $230 \mu\text{m}$ ;  $C_{R4}$ :  $108 \pm 35 \mu\text{m}$ , Fig. 3a) and less symmetric shapes (e.g., Circularity:  $C_{R1}$ :  $11.78 \pm$   
399  $7.80$  and  $C_{R4}$ :  $19.11 \pm 5.24$ , Fig. 3a). Moreover, clumping strains exhibited a larger diversity of  
400 cell morphotypes within population ranging from single cells to large cells aggregates (Fig. 2a  
401 and 3a). The 40 CV of morphological features were significantly different among strains (i.e.,  
402 inter-strain variance, Kruskal-Wallis,  $\chi^2 = 20.64$ ,  $P < 0.001$ ) with higher mean CV values for  
403 clumping strains (e.g.,  $C_{R1}$ : 46% and  $C_{R4}$ : 32%, Fig. 3b). Moreover, the 40 CV were  
404 significantly different among morphotypes only within clumping strains (i.e., intra-strain  
405 variance, e.g.,  $C_{R2}$ : Kruskal-Wallis,  $\chi^2 = 16.39$ ,  $P < 0.001$  and  $C_{R6}$ : Kruskal-Wallis,  $\chi^2 = 0.36$ ,  
406  $P = 0.551$ ). These observations suggest that clumping strains consisted of distinct subclasses of  
407 cell morphotypes. Overall, the presence or absence of clumping morphotypes coincided with  
408 the defensive and competitive abilities of strains, meaning that strains having large cell clumps  
409 were characterized as very defended and poorly competitive and vice versa (Fig. 4).

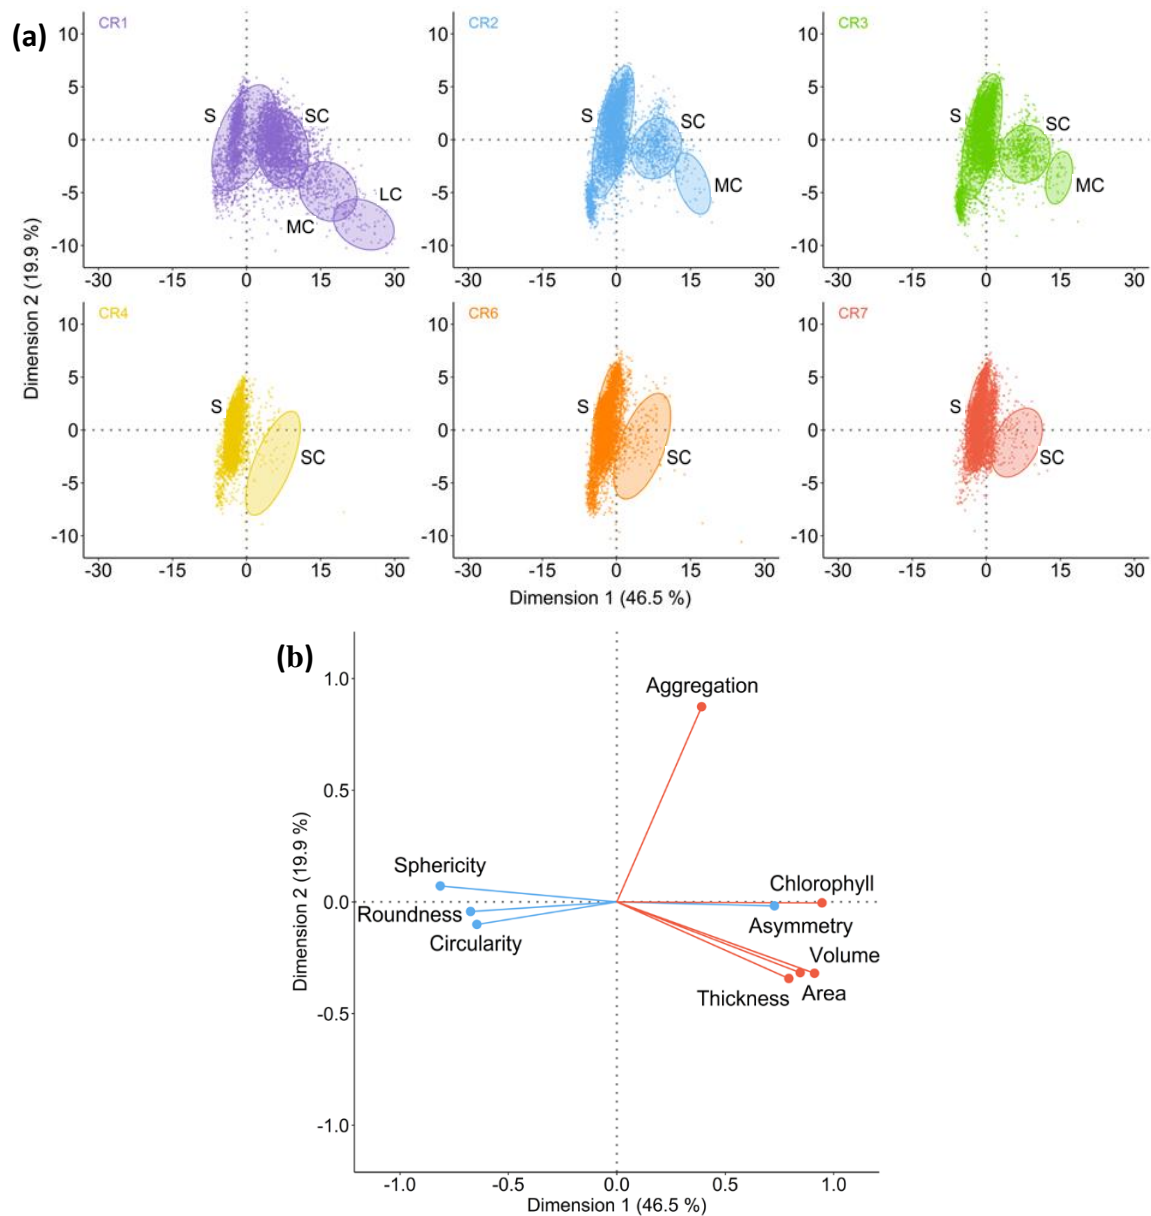

411 **Figure 2:** (a) Representation of the principal components analysis (PCA) showing (a) the  
412 position of individual cell observations for populations of *C. reinhardtii* strains ( $n = 5000$ ) and  
413 (b) the positions of the most representative morphological features ( $n = 9$ ) along the 2 main  
414 dimensions explaining most of the variance ( $D1 = 46.5\%$  and  $D2 = 19.9\%$ ). Ellipses group 95%  
415 of the cell observations for each morphotype population within strains. Morphotype categories:  
416 single cell (S, 1 cell), small clump (SC, 2–4 cells), medium clump (MC, 5–10 cells) and large  
417 clump (LC,  $> 10$  cells). Features represented here were selected based on the highest  
418 contributions to the 2 main dimensions according to the PCA and were divided in 2 groups:  
419 size features (red) and shape features (blue).

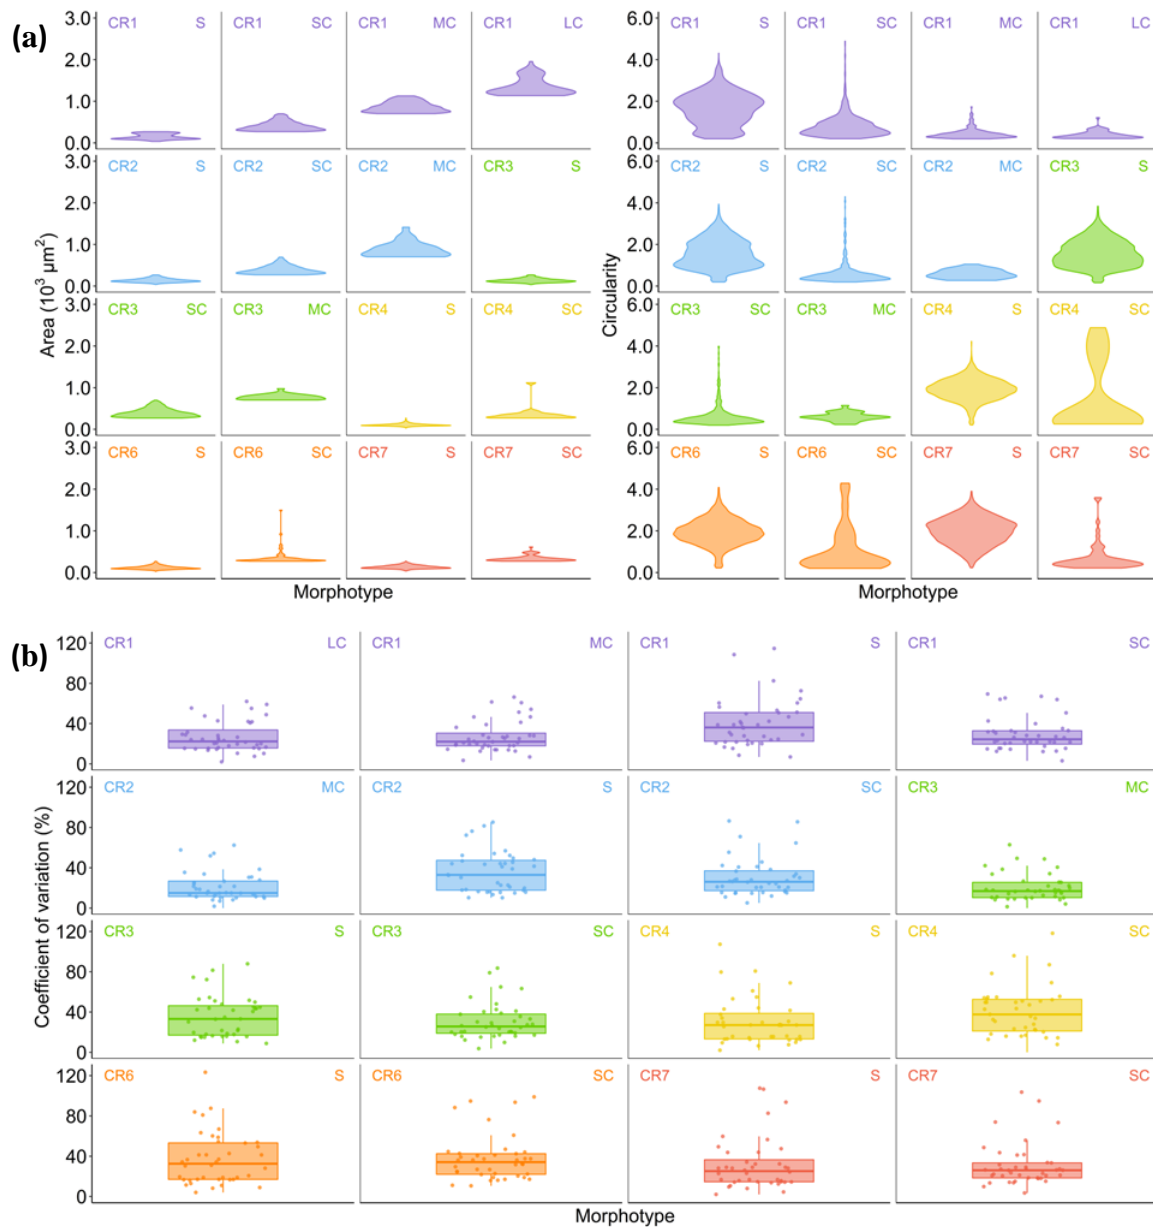

420 **Figure 3:** (a) Density distribution of values for 2 relevant morphological features (Area for size  
 421 and Circularity for shape) explaining most of the variance in the PCA for each *C. reinhardtii*  
 422 morphotype population. (b) Distribution of coefficients of variation for morphological traits of  
 423 the PCA (n = 40 traits) for each *C. reinhardtii* morphotype with median and quartiles (boxes)  
 424 and 95% confidence intervals (vertical bars). Morphotype categories: single cell (S, 1 cell),  
 425 small clump (SC, 2–4 cells), medium clump (MC, 5–10 cells) and large clump (LC, > 10 cells).  
 426

427 *Defence-competitiveness trade-off*

428 The relationship between anti-grazing defence and competitiveness traits of *C. reinhardtii*  
429 strains was consistent for the different traits we used (Fig. 4a). Defended and non-competitive  
430 strains ( $C_{R1}$ ,  $C_{R2}$  and  $C_{R3}$ ) were positioned on the top left corner of the trait space, being  
431 characterized by large-sized cell clumps (e.g.,  $C_{R1}$ :  $323 \pm 230 \mu\text{m}$ ), resulting in low attack rates  
432 (e.g.,  $C_{R1}$ :  $0.06 \pm 0.01 \text{ mL sec}^{-1}$ ), high handling times (e.g.,  $C_{R1}$ :  $2.84 \pm 0.36 \text{ sec}^{-1}$ ) and low  
433 growth rates for the predator (e.g.,  $C_{R1}$ :  $-0.05 \pm 0.18 \text{ day}^{-1}$ ). Conversely, undefended and  
434 competitive strains ( $C_{R4}$ ,  $C_{R6}$  and  $C_{R7}$ ) were positioned on the bottom right corner of the trait  
435 space, being characterized by small-sized single cells (e.g.,  $C_{R4}$ :  $108 \pm 35 \mu\text{m}$ ), resulting in high  
436 attack rates (e.g.,  $C_{R4}$ :  $0.46 \pm 0.07 \text{ mL sec}^{-1}$ ), low handling times (e.g.,  $C_{R4}$ :  $0.35 \pm 0.02 \text{ sec}^{-1}$ )  
437 and high growth rates for the predator (e.g.,  $C_{R4}$ :  $2.33 \pm 0.27 \text{ day}^{-1}$ ). Moreover, the positions of  
438 strains were similar for trait spaces constructed with prey growth rates or nutrient acquisition  
439 rates (i.e., nitrate affinities and half saturation constants) as traits for competitiveness (Fig. 4b).  
440 Furthermore, the variance in anti-grazing defence and competitiveness traits within strains was  
441 low or moderate so that most of the strain-specific surfaces covered on the trait spaces (i.e.,  
442 standard deviations) were not overlapping, reinforcing the relevance of these traits for  
443 predicting different fitness strategies.

444



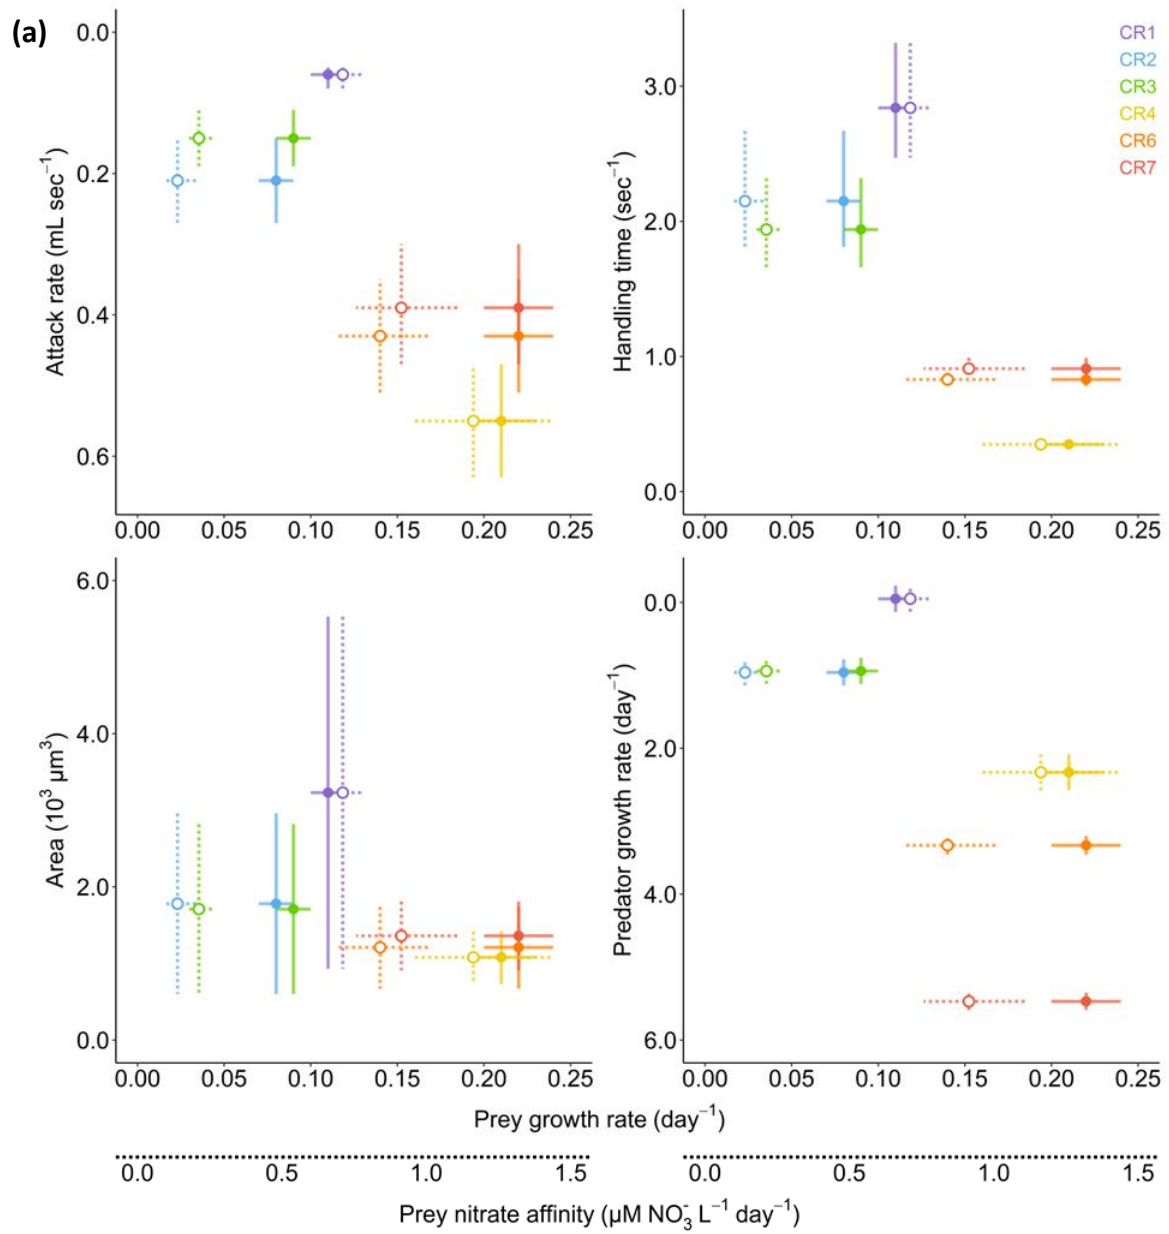

445

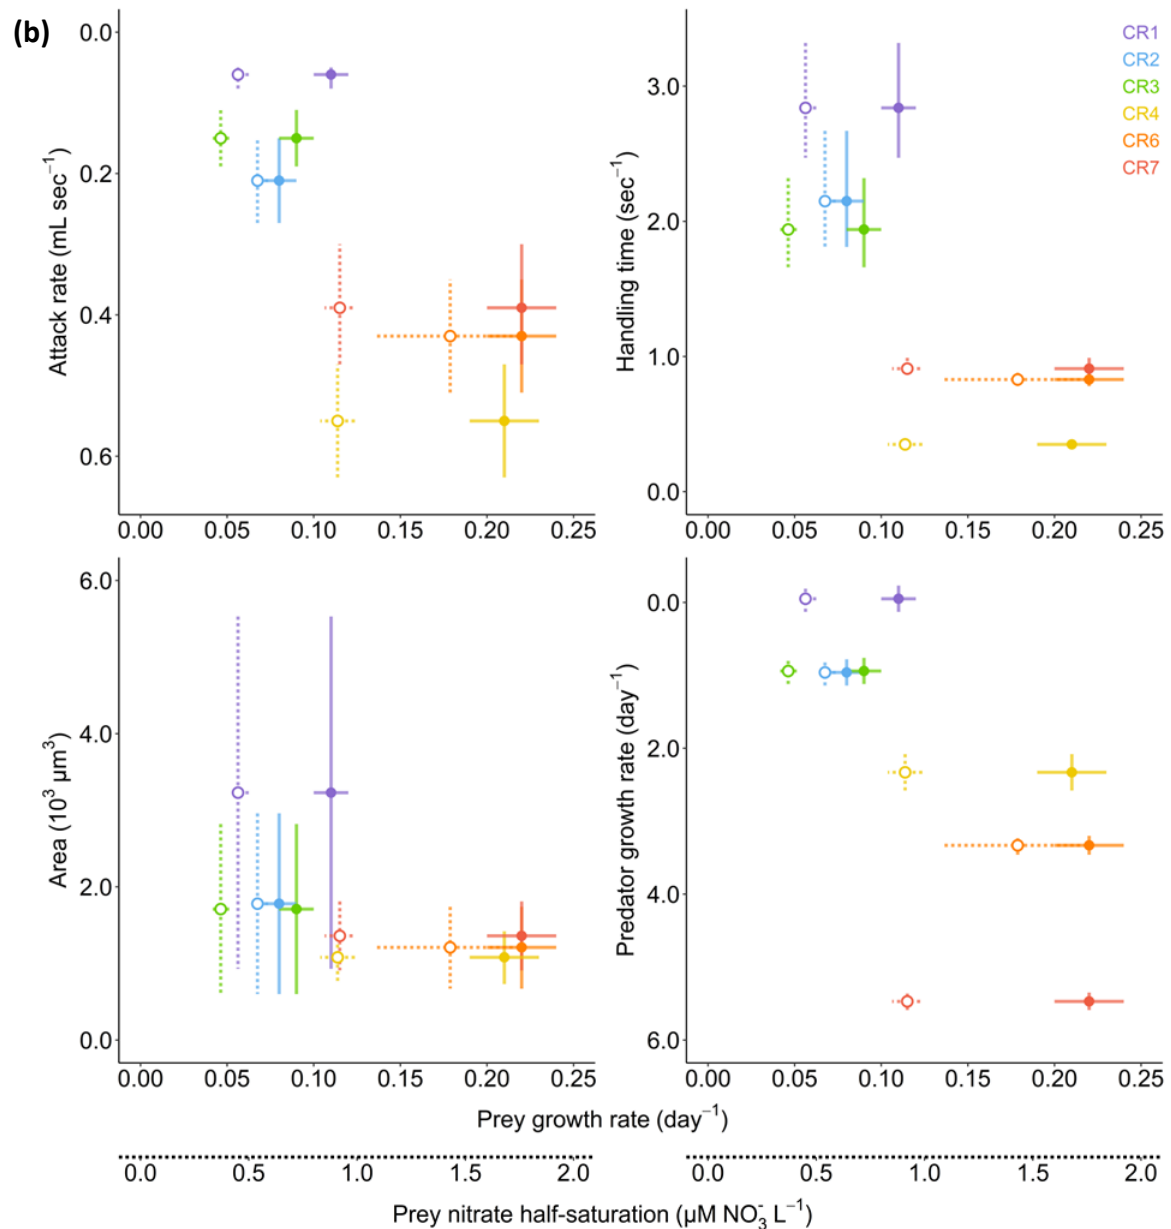

446 **Figure 4:** Defence-competitiveness trait spaces showing the positions of *C. reinhardtii* strains  
 447 for 4 anti-grazing defence traits (i.e., attack rate, handling time, cell area and predator *per capita*  
 448 growth rate) as a function of 3 competitiveness traits (i.e., prey *per capita* growth rate, nitrate  
 449 affinity constant and nitrate half-saturation constant). Trait values (symbols) and standard  
 450 deviations (horizontal and vertical bars) were represented pairwise for competitiveness traits on  
 451 each plot: (a) growth rate (filled symbols and solid bars) and nitrate affinity constant (open  
 452 symbols and dotted bars) and (b) growth rate (filled symbols and solid bars) and nitrate half-  
 453 saturation constant (open symbols and dotted bars). Values of attack rate and predator *per*  
 454 *capita* growth rate were flipped to orientate the axis according to the trade-off hypothesis:  
 455 increasing defence (y-axis) against increasing competitiveness (x-axis).

## 456 **Discussion**

457 Exploring the intraspecific variation in traits related to fitness in phytoplankton species, such  
458 as defence against zooplankton grazing and competitiveness, is essential to understand fitness  
459 strategies and predict ecological interactions of planktonic species ( Hairston et al. 2005). We  
460 found substantial variation in trophic and morphological traits related to anti-grazing defence  
461 and competitiveness for 6 different strains of *C. reinhardtii*. The patterns of variation were  
462 consistent for the different defence and competitiveness traits as *C. reinhardtii* strains had  
463 similar positions when comparing in trait space. Moreover, we identified a consistent negative  
464 relationship between defence and competitiveness traits, suggesting a limitation in energy  
465 investment between these two fitness components (Stearns 1989). The consistency of the trade-  
466 off relationship confirmed that multiple morphological and trophic traits of prey and predator  
467 can constitute suitable proxies to assess prey fitness strategies and the strength of predator-prey  
468 interaction. Measuring consistent indicators for defence-competitiveness trade-offs could be  
469 particularly relevant for the assessment of ecological dynamics in disturbed ecosystems because  
470 direct and indirect (i.e., via interacting species) responses of species depend on the presence  
471 (Yamamichi and Miner 2015) and the amount of trait variation (Hermann and Becks 2022). In  
472 addition, the heritability of trait variation represents a prerequisite for adaptation of species to  
473 disturbed ecosystems and this depends to a large extent on trade-offs (Smith et al. 2016).

474 Prey defence against predation was well estimated using prey morphology, predator  
475 ingestion or predator growth. Morphological traits are particularly relevant to estimate the  
476 variation in defensive abilities among and within prey population and can serve as good  
477 indicators of changes in the defence trait of prey population over time in both empirical (e.g.,  
478 Becks et al. 2010) and modelling studies (e.g., Ellner and Becks 2011). Some caution is still  
479 required with morphology as other structural traits related to physiology and behaviour which

480 we did not consider can contribute to defence (Pančić and Kiørboe 2018; Lürling 2020). Prey  
481 competitiveness was well estimated using prey growth and resource acquisition, which shows  
482 a relation between the processes of nutrient absorption, assimilation, and conversion to  
483 reproduction (Litchman et al. 2007). However, complex interplays between processes may  
484 complicate predictions as prey competitiveness can also be driven by other regulating factors  
485 such as the acquisition of colimiting resources (Klausmeier et al. 2004) or trade-offs between  
486 nutrient and light acquisition (Strzepek and Harrison 2004).

487         Developing empirical methods that examine the consistency of the relationship between  
488 traits is central to confirm the presence of trade-offs. We used 6 isolates of *C. reinhardtii*  
489 selected from monoclonal populations that grew in the presence or absence of predation by *B.*  
490 *calyciflorus* (Bernardes et al. 2021). Our approach circumvents some difficulties of previous  
491 studies examining suitable indicators as we measured trade-offs using clones derived from a  
492 selection experiment where monoclonal ancestors evolved in different environments in which  
493 selection either favoured defence or competitiveness (Bernardes et al. 2021). This approach has  
494 been proven to be more suitable for detecting trade-offs (Kassen 2002; Fry 2003; Fuller et al.  
495 2005) because negative correlations between traits measured in clones isolated from the same  
496 environment or from different environments without assessing the environmental conditions  
497 are not evidence of evolutionary constraint (Stearns 1989). Similarly, a positive or no  
498 correlation can result from several confounding factors (e.g., small detection signal or  
499 environmental conditions) and thus does not imply causality or lack thereof (Bohannan et al.  
500 2002; Fry 2003). To our knowledge, our study is the first to extend the characterization of clonal  
501 lines to multiple traits to examine the consistency of an intraspecific trade-off between defence  
502 and competitiveness using evolved isolates for which the history of selection is known.

503         Algal prey strains considered as defended against ingestion by the predator were  
504 growing as clumped cells bound by a viscous extracellular matrix which colony sizes of 10–30

505 cells. These strains were associated with lower functional responses of the predator, which were  
506 mainly the consequence of a longer handling time and the inability of the predator to ingest cell  
507 colonies. Colony formation can be an effective defence for phytoplankton and significantly  
508 reduces zooplankton grazing (Van Donk et al. 1999; Reynolds 2006). Palmelloid colonies were  
509 previously observed for *C. reinhardtii* in the presence of the rotifer *B. calyciflorus* and was  
510 shown to be due together from phenotypic plasticity (i.e., inducible, Lürling 2006; Fischer et al.  
511 2014) or adaptive evolution (i.e., constitutive, Becks et al. 2010; Ratcliff et al. 2013; Bernardes  
512 et al. 2021). Palmelloid colonies are composed of cells forming large aggregates (~10–120  
513 cells) embedded in an extracellular matrix (Lürling 2006). In addition to colonies reducing  
514 ingestion rates of gape size limited predators, the extracellular matrix can also provide a  
515 digestion resistance to cells during gut passage (Van Donk and Hessen 1993; DeMott et al.  
516 2010). Furthermore, we found substantial variation in competitiveness traits among the 6  
517 different strains of *C. reinhardtii*. Prey strains considered as competitive were associated with  
518 higher nitrate affinities and *per capita* growth rates and lower nitrate half-saturation constants,  
519 which indicated enhanced abilities for nutrient acquisition and/or conversion to reproduction  
520 (Litchman et al. 2007; Litchman and Klausmeier 2008; Halsey and Jones 2015; Ward et al.  
521 2017). Competitive abilities of phytoplankton species mainly depend on surface-area constraints  
522 in terms of resource acquisition and requirements for basal maintenance and functions  
523 contributing to fitness. Single cells tend to have higher nutrient acquisition rates due to a more  
524 efficient diffusion of molecules (Yoshiyama and Klausmeier 2008) while palmelloid colonies  
525 are more limited by nutrient and light competition among colonial cells and a shading effect  
526 (Raven and Kubler 2002), despite larger nutrient storage capacities (Litchman et al. 2009).

527         Intraspecific variation in trophic and morphological traits of preys is expected to have  
528 important consequences on higher trophic levels and ecosystem functioning. We found that the  
529 numerical response of the predator *B. calyciflorus* differed depending on the defensive and

530 competitive abilities of *C. reinhardtii* strains. Predator populations were increasing and then  
531 decreasing in the presence of defended prey strains but were increasing more and then constant  
532 in the presence of intermediate and competitive prey strains. Such observations suggest a  
533 mechanistic link between prey defensive and competitive abilities, predator-prey trophic  
534 interactions and predator reproduction (Litchman et al. 2013). Moreover, defence and  
535 competitiveness traits of phytoplankton are fundamental determinants of the energy intake by  
536 zooplankton predators by defining food quantity and quality (Bi and Sommer 2020). Prey  
537 defensive morphologies and stoichiometric ratios might reduce food quality, which prevents the  
538 predator from meeting its biochemical requirements and thus reduces its survival and  
539 reproduction (Sommer et al. 2012). The considerable impact of prey fitness on predator fitness,  
540 driven by a defence-competitiveness trade-off, and the implications for energy transfers  
541 between trophic levels highlights the importance of assessing the consistency of trade-offs to  
542 determine the outcome of trophic interactions and food web dynamics.

543 Investigating intraspecific trade-off relationships between defensive and  
544 competitiveness traits is fundamental to understand fitness strategies of phytoplankton  
545 (Litchman et al. 2007; Cadier et al. 2019; Ehrlich et al. 2017) and estimate the strength of  
546 trophic interactions and coexistence between phytoplankton and zooplankton species (Våge et  
547 al. 2014; Cadier et al. 2019; Ehrlich et al. 2020). Our study demonstrates the consistency of an  
548 intraspecific defence-competitiveness trade-off relationship estimated empirically over a broad  
549 range of trophic traits measured on both prey and predator organisms. Previous studies have  
550 shown that intraspecific trade-off relationships are a prerequisite for eco-evolutionary feedback  
551 dynamics, which in turn contribute to the maintenance of trait variation (e.g., Becks et al. 2010;  
552 2012; Kasada et al. 2014). Knowledge on the underlying traits involved in trade-offs and how  
553 these trade-offs translate into fitness of organisms at different trophic levels is required for  
554 predicting the response of communities to environmental perturbation (Jessup and Bohannan

555 2008; Frickel et al. 2017; Theodosiou et al. 2019; Hermann and Becks 2022). The comparisons  
556 of trait variation and trade-offs at the intra- and interspecific levels (Ehrlich et al. 2017; 2020)  
557 could also provide key insights into the role of intraspecific diversity and trade-offs for species  
558 coexistence and ecosystem functioning with environmental change.

559

## 560 Tables

561 **Table 1:** Functional parameters [ $\pm$  standard deviation] of the 6 different *C. reinhardtii* strains.  
 562 Anti-grazing defences were represented by the attack rate ( $a$  in mL sec<sup>-1</sup>), the handling time ( $h$   
 563 in sec<sup>-1</sup>), the detection probabilities ( $p$ ) and the ingestion probabilities ( $d$ ). Competitiveness  
 564 ability was represented by the half-saturation constants ( $K$  in  $\mu\text{mol NO}_3^- \text{L}^{-1}$ ) and the affinity  
 565 constants ( $A$  in  $10^3 \mu\text{mol NO}_3^- \text{L}^{-1} \text{day}^{-1}$ ) for nitrate. Strains exhibited different morphologies in  
 566 terms of cell clumping: clumping strains were C<sub>R1</sub> (large free clumps [10–30 cells]), C<sub>R2</sub>  
 567 (medium mucous clumps [5–10 cells]), C<sub>R3</sub> (medium mucous clumps [5–10 cells]) and C<sub>R7</sub>  
 568 (small free clumps [3–5 cells]) while non-clumping strains were C<sub>R4</sub> (small single cells, motile)  
 569 and C<sub>R6</sub> (small single cells).

| <i>Strain</i>   | $a$                 | $h$                 | $p$                 | $d$                 | $K$                 | $A$                 |
|-----------------|---------------------|---------------------|---------------------|---------------------|---------------------|---------------------|
| C <sub>R1</sub> | 0.06<br>[0.05–0.08] | 2.84<br>[2.47–3.32] | 0.35<br>[0.39–0.44] | 0.12<br>[0.11–0.14] | 0.92<br>[0.85–0.98] | 0.77<br>[0.72–0.84] |
| C <sub>R2</sub> | 0.21<br>[0.15–0.27] | 2.15<br>[1.81–2.67] | 1.00<br>[1.00–1.00] | 0.16<br>[0.14–0.19] | 1.43<br>[1.09–1.78] | 0.15<br>[0.10–0.22] |
| C <sub>R3</sub> | 0.15<br>[0.11–0.19] | 1.92<br>[1.63–2.34] | 0.65<br>[0.64–0.66] | 0.18<br>[0.16–0.20] | 0.91<br>[0.83–0.99] | 0.23<br>[0.18–0.28] |
| C <sub>R4</sub> | 0.55<br>[0.48–0.63] | 0.35<br>[0.33–0.37] | 0.44<br>[0.43–0.44] | 1.00<br>[1.00–1.00] | 0.37<br>[0.33–0.41] | 1.26<br>[1.03–1.55] |
| C <sub>R6</sub> | 0.43<br>[0.35–0.51] | 0.83<br>[0.78–0.88] | 0.79<br>[0.78–0.82] | 0.43<br>[0.42–0.43] | 0.54<br>[0.50–0.59] | 0.91<br>[0.75–1.09] |
| C <sub>R7</sub> | 0.39<br>[0.30–0.48] | 0.91<br>[0.85–0.99] | 0.80<br>[0.77–0.84] | 0.38<br>[0.37–0.39] | 0.45<br>[0.41–0.50] | 0.99<br>[0.82–1.20] |

570



## 571 **References**

- 572 Agrawal, A.A. (1998). Algal defense, grazers, and their interactions in aquatic trophic cascades. *Acta*  
573 *Oecologica*, 19: 331–337.
- 574 Barnett, A.J. et al. (2007). Functional diversity of crustacean zooplankton communities: towards a trait–  
575 based classification. *Freshwater Biology*, 52: 796–813.
- 576 Barreiro, A. and Hairston, N.G. (2013). The influence of resource limitation on the allelopathic effect  
577 of *Chlamydomonas reinhardtii* on other unicellular freshwater planktonic organisms. *Journal of*  
578 *Plankton Research*, 35: 1339–1344.
- 579 Barrett, R.D. and Schluter, D. (2008). Adaptation from standing genetic variation. *Trends in Ecology*  
580 *and Evolution*, 23: 38–44.
- 581 Bateman, A. et al. (2014). When to defend: antipredator defenses and the predation sequence. *The*  
582 *American Naturalist*, 183: 847–855.
- 583 Becks, L. et al. (2010). Reduction of adaptive genetic diversity radically alters eco-evolutionary  
584 community dynamics. *Ecology letters*, 13: 989–997.
- 585 Becks, L. et al. (2012). The functional genomics of an eco-evolutionary feedback loop: linking gene  
586 expression, trait evolution, and community dynamics. *Ecology Letters*, 15: 492–501.
- 587 Bennett, W.N. and Boraas, M.E. (1989). Comparison of population dynamics between slow- and fast-  
588 growing strains of the rotifer *Brachionus calyciflorus* pallas in continuous culture. *Oecologia*, 81: 494–  
589 500
- 590 Bernardes, J. et al. (2021). The evolution of convex trade-offs enables the transition towards  
591 multicellularity. *Nature Communication*, 12: 4222.
- 592 Bi, R. and Sommer, U. (2020). Food quantity and quality interactions at phytoplankton-zooplankton  
593 interface: chemical and reproductive responses in a calanoid copepod. *Frontiers in Marine Science*, 7:  
594 274.
- 595 Breiman, L. (2001), Random forests. *Machine Learning*, 45: 5–32.
- 596 Brose, U. et al. (2005). From food webs to ecological networks: linking non-linear trophic interactions  
597 with nutrient competition. In: *Dynamic food webs* (eds. de Ruiter, P., Wolters, V. and Moore, J.),  
598 *Academic Press*, Burlington, USA, 27–36.
- 599 Bruggeman, J. (2011). A phylogenetic approach to the estimation of phytoplankton traits. *Journal of*  
600 *Phycology*, 47: 52–65.
- 601 Cadier, M. et al. (2019). Competition–defense tradeoff increases the diversity of microbial plankton  
602 communities and dampens trophic cascades. *Oikos*, 128: 1027–1040.
- 603 Colina, M. et al. (2016). A trait–based approach to summarize zooplankton–phytoplankton interactions  
604 in freshwaters. *Hydrobiologia*, 767: 221–233.
- 605 Cortez, M.H. (2016). How the magnitude of prey genetic variation alters predator-prey eco-evolutionary  
606 dynamics. *The American Naturalist*, 188: 329–341.

- 607 DeMott, W.R. et al. (2010). Ontogeny of digestion in *Daphnia*: implications for the effectiveness of  
608 algal defenses. *Ecology*, 91: 540–548.
- 609 Edwards, K.F. et al. (2011). Evidence for a three-way trade-off between nitrogen and phosphorus  
610 competitive abilities and cell size in phytoplankton. *Ecology*, 92: 2085–2095.
- 611 Edwards, K.F. et al. (2013). Functional traits explain phytoplankton community structure and seasonal  
612 dynamics in a marine ecosystem. *Ecology Letters*, 16: 53–63.
- 613 Ehrlich, E. and Gaedke, U. (2018). Not attackable or not crackable. How pre- and post-attack defenses  
614 with different competition costs affect prey coexistence and population dynamics. *Ecology and*  
615 *Evolution*, 8: 6625–6637.
- 616 Ehrlich, E. et al. (2017). Trait–fitness relationships determine how trade-off shapes affect species  
617 coexistence. *Ecology*, 98: 3188–3198.
- 618 Ehrlich, E. et al. (2020). The shape of a defense-growth trade-off governs seasonal trait dynamics in  
619 natural phytoplankton. *The ISME Journal*, 14: 1451–1462.
- 620 Ellner, S.P. and Becks, L. (2011). Rapid prey evolution and the dynamics of two-predator food webs.  
621 *Theoretical Ecology*, 4: 133–152.
- 622 Fischer, B.B. et al. (2014). Phenotypic plasticity influences the eco-evolutionary dynamics of a  
623 predator–prey system. *Ecology*, 95: 3080–3092.
- 624 Fleischer, S.R. et al. (2018). Pick your trade-offs wisely: Predator-prey eco-evo dynamics are  
625 qualitatively different under different trade-offs. *Journal of Theoretical Biology*, 456: 201–212.
- 626 Frickel, J. et al. (2017). Rapid evolution of hosts begets species diversity at the cost of intraspecific  
627 diversity. *Proceedings of the National Academy of Sciences of the USA*, 114: 11193–11198.
- 628 Friedrichs, L. et al. (2013). Size and biomechanic properties of diatom frustules influence food uptake  
629 by copepods. *Marine Ecology Progress Series*, 481: 41–51.
- 630 Fuller, R.C. et al. (2005). How and when selection experiments might actually be useful. *Integrative and*  
631 *Comparative Biology*, 45: 391–404.
- 632 Fussmann, G.F. et al. (2000). Crossing the Hopf bifurcation in a live predator-prey system. *Science*, 290:  
633 1358–1360.
- 634 Fussmann, G.F. et al. (2003). Evolution as a critical component of plankton dynamics. *Proceedings of*  
635 *the Royal Society B*, 270: 1015–1022.
- 636 Fry, J.D. (2003). Detecting ecological trade-offs using selection experiments. *Ecology*, 84: 1672–1678.
- 637 Gibert, J.P. and Brassil, C. (2014). Individual phenotypic variation reduces interaction strengths in a  
638 consumer–resource system. *Ecology and Evolution*, 4: 3703–3713.
- 639 Gilbert, B. et al. (2014). A bioenergetic framework for the temperature dependence of trophic  
640 interactions. *Ecology Letters*, 17: 902–914.
- 641 Hairston, N.G. et al. (2005). Rapid evolution and the convergence of ecological and evolutionary time.  
642 *Ecology Letters*, 8: 1114–1127.

- 643 Halsey, K.H. and Jones, B.M. (2015). Phytoplankton strategies for photosynthetic energy allocation.  
644 *Annual Review of Marine Science*, 7: 265–297.
- 645 Hammill, E. et al. (2010). Predator functional response changed by induced defenses in prey. *The*  
646 *American Naturalist*, 176: 723–731.
- 647 Harvey, E.L. et al. (2015). Consequences of strain variability and calcification in *Emiliana huxleyi* on  
648 microzooplankton grazing. *Journal of Plankton Research*, 37: 1137–1148.
- 649 Heinen, M. (1999) Analytical growth equations and their Genstat 5 equivalents. *Netherlands Journal of*  
650 *Agricultural Science*, 47: 67–89.
- 651 Herrman, R.J. and Becks, L. (2022). Change in prey genotype frequency rescues predator from  
652 extinction. *BioRxiv*, <https://doi.org/10.1101/2022.04.19.487766>.
- 653 Hessen, D.O. and Van Donk, E. (1993). Morphological-changes in *Scenedesmus* induced by substances  
654 released from *Daphnia*. *Archiv fur Hydrobiologie*, 127: 129–140.
- 655 Holling, C.S. (1959). Some characteristics of simple types of predation and parasitism. *Canadian*  
656 *Entomologist*, 91: 385–398.
- 657 Holling, C.S. (1965). The functional response of predators to prey density. *Memoirs of the*  
658 *Entomological Society of Canada*, 45: 1–60.
- 659 Huang, W. et al. (2018). Dynamical trade-offs arise from antagonistic coevolution and decrease  
660 intraspecific diversity. *Nature Communication*, 8: 2059.
- 661 Hubbell, S.P. (2005). Neutral theory in community ecology and the hypothesis of functional  
662 equivalence. *Functional Ecology*, 19: 166–172.
- 663 Hudson, P.J. et al. (2002). Trophic interactions and population growth rates: describing patterns and  
664 identifying mechanisms. *Philosophical Transactions of the Royal Society B*, 357: 1259–1271.
- 665 Ivlev, V.S. (1955). Experimental ecology of the feeding of fishes. *Pishepromizdat*, Moscow, 302 p.  
666 (Translated from Russian by D. Scott, *Yale University Press*, New Haven, 1961).
- 667 Jeschke, J.M. et al. (2002). Pedator functional responses: discriminating between handling and digesting  
668 prey. *Ecological Monograph*, 72: 95–112.
- 669 Jeschke, J.M. et al. (2004). Consumer–food systems: why type I functional responses are exclusive to  
670 filter feeders. *Biological Reviews*, 79: 337–349.
- 671 Jessup, C.M. and Bohannan, B.J. (2008). The shape of an ecological trade-off varies with environment.  
672 *Ecology Letters*, 11: 947–959.
- 673 Jochimsen, M.C. et al. (2013). Compensatory dynamics and the stability of phytoplankton biomass  
674 during four decades of eutrophication and oligotrophication. *Ecology Letters*, 16: 81–89.
- 675 Jones, L.E. and Ellner, S.P. (2007). Effects of rapid prey evolution on predator-prey cycles. *Journal of*  
676 *Mathematical Biology*, 55: 541–573.
- 677 Jones, L.E. et al. (2009). Rapid contemporary evolution and clonal food web dynamics. *Philosophical*  
678 *Transactions of the Royal Society B*, 364: 1579–1591.

- 679 Jonsson, T. et al. (2010). Trophic interactions affect the population dynamics and risk of extinction of  
680 basal species in food webs. *Ecological Complexity*, 7: 60–68.
- 681 Jost, J.L. et al. (1973). Microbial food chains and food webs. *Journal of Theoretical Biology*, 41: 461–  
682 484.
- 683 Kalinoski, R.M. and DeLong, J.P. (2016). Beyond body mass: how prey traits improve predictions of  
684 functional response parameters. *Oecologia*, 180: 543–550.
- 685 Kasada, M. et al. (2014). Form of an evolutionary trade-off affects eco-evolutionary dynamics in a  
686 predator–prey system. *Proceedings of the National Academy of Sciences of the USA*, 111: 16035–16040.
- 687 Kassen, R. (2002). The experimental evolution of specialists, generalists, and the maintenance of  
688 diversity. *Journal of Evolutionary Biology*, 15:173–190.
- 689 Kiørboe, T. (2008). A mechanistic approach to plankton ecology. *Princeton University Press*, Princeton:  
690 224 p.
- 691 Kiørboe, T. et al. (2016). Foraging mode and prey size spectra of suspension-feeding copepods and other  
692 zooplankton. *Marine Ecology Progress Serie*, 558: 15–20
- 693 Kiørboe, T. et al. (2017). Adaptive feeding behavior and functional responses in zooplankton. *Limnology  
694 and Oceanography*, 63: 308–321.
- 695 Klausmeier, C.A. et al. (2004). Optimal nitrogen-to-phosphorus stoichiometry of phytoplankton.  
696 *Nature*, 429: 171–174.
- 697 Kneitel, J.M. and Chase, J.M. (2004). Trade-offs in community ecology: linking spatial scales and  
698 species coexistence. *Ecology Letters*, 7: 69–80.
- 699 Kolb, A. and Strom, S. (2013). An inducible antipredatory defense in haploid cells of the marine  
700 microalga *Emiliania huxleyi* (Prymnesiophyceae). *Limnology and Oceanography*, 58: 932–944.
- 701 Litchman, E. (2007). Resource competition and the ecological success of phytoplankton. In: Evolution  
702 of primary producers in the sea (eds. Falkowski, P.G. and Knoll, A.H.). *Elsevier*, New York, USA,  
703 351–375.
- 704 Litchman, E. and Klausmeier, C.A. (2008). Trait–based community ecology of phytoplankton. *Annual  
705 Review of Ecology Evolution and Systematics*, 39: 615–639.
- 706 Litchman, E. et al. (2007). The role of functional traits and trade-offs in structuring phytoplankton  
707 communities: scaling from cellular to ecosystem level. *Ecology Letters*, 10: 1170–1181.
- 708 Litchman, E. et al. (2009). Contrasting size evolution in marine and freshwater diatoms. *Proceedings of  
709 the National Academy of Sciences of the USA*, 106: 2665–2670.
- 710 Litchman, E. et al. (2010). Linking traits to species diversity and community structure in phytoplankton.  
711 *Hydrobiologia*, 653:15–28.
- 712 Litchman, E. et al. (2013). Trait–based approaches to zooplankton communities. *Journal of Plankton  
713 Research*, 35: 473–484.
- 714 Litchman, E. et al. (2015). Microbial resource utilization traits and trade-offs: implications for  
715 community structure, functioning, and biogeochemical impacts at present and in the future. *Frontiers in  
716 Microbiology*, 6: 1–10.

- 717 Long, J.D. et al. (2007). Chemical cues induce consumer-specific defenses in a bloom-forming marine  
718 phytoplankton. *Proceedings of the National Academy of Sciences of the USA*, 104: 10512–10517.
- 719 Lürling, M. (2006). Palmelloids formation in *Chlamydomonas reinhardtii*: defence against rotifer  
720 predators? *International Journal of Limnology*, 42: 65–72.
- 721 Lürling, M. (2020). Grazing resistance in phytoplankton. *Hydrobiologia*, 848: 237–249.
- 722 Lürling, M. and Van Donk, E. (1996). Zooplankton-induced unicell-colony transformation in  
723 *Scenedesmus acutus* and its effect on growth of herbivore *Daphnia*. *Oecologia*, 108, 432–437.
- 724 Lürling, M. and Van Donk, E. (2000). Grazer-induced colony formation in *Scenedesmus*: are there costs  
725 to being colonial? *Oikos*, 88: 111–118.
- 726 Malerba, M.E. et al. (2018). Do larger individuals cope with resource fluctuations better? An artificial  
727 selection approach. *Proceedings of the Royal Society B*, 285: 20181347.
- 728 Modenutti, B. et al. (2003). Impact of different zooplankton structures on the microbial food web of a  
729 South Andean oligotrophic lake. *Acta Oecologica*, 24: 289–298.
- 730 Monod, J. (1950). La technique de culture continue: Théorie et applications. *Annales de l'Institut*  
731 *Pasteur*, 79 : 390–410.
- 732 Mullin, M.M. et al. (1975). Ingestion by planktonic grazers as a function of food concentration.  
733 *Limnology and Oceanography*, 20: 259–262.
- 734 Murdoch, W.W. et al. (2003). Consumer–Resource Dynamics. *Princeton University Press*, Princeton:  
735 464 p.
- 736 Pančić, M. and Kiørboe, T. (2018). Phytoplankton defence mechanisms: traits and trade-offs. *Biological*  
737 *Reviews*, 93: 1269–1303.
- 738 Paine, C.E. et al. (2012). How to fit nonlinear plant growth models and calculate growth rates: an update  
739 for ecologists. *Methods in Ecology and Evolution*, 3: 245–256.
- 740 Persson, A. et al. (2001). Effects of enrichment on simple aquatic food webs. *The American Naturalist*,  
741 6: 664–669.
- 742 Petchey, O.L. et al. (2008). Size, foraging, and food web structure. *Proceedings of the National Academy*  
743 *of Sciences of the USA*, 105: 4191–4196.
- 744 Pondaven, P. et al. (2007). Grazing-induced changes in cell wall silicification in a marine diatom.  
745 *Protist*, 158: 21–28.
- 746 Quintana, X.D. et al. (2015). Predation and competition effects on the size diversity of aquatic  
747 communities. *Aquatic Sciences*, 77: 45–57.
- 748 R Development Core Team. 2020. R: A language and environment for statistical computing. R  
749 Foundation for Statistical Computing, Vienna, Austria.
- 750 Rall, B.C. et al (2012). Universal temperature and body-mass scaling of feeding rates. *Philosophical*  
751 *Transaction of the Royal Society B*, 367: 2923–2934.
- 752 Ratcliff, W.C. et al. (2013). Experimental evolution of an alternating uni- and multicellular life cycle in  
753 *Chlamydomonas reinhardtii*. *Nature Communications*, 4: 2742.



- 754 Reynolds, C.S. (2006). Ecology of phytoplankton. *Cambridge University Press*, New York: 1–535.
- 755 Rip, J.M. and McCann, K.S. (2011). Cross-ecosystem differences in stability and the principle of energy  
756 flux. *Ecology Letters*, 14: 733–740.
- 757 Smith, S.L. et al. (2014). Sizing-up nutrient uptake kinetics: combining a physiological trade-off with  
758 size-scaling of phytoplankton traits. *Marine Ecology Progress Series*, 511: 33–39.
- 759 Smith, S.L. et al. (2016). Phytoplankton size-diversity mediates an emergent trade-off in ecosystem  
760 functioning for rare versus frequent disturbances. *Scientific Reports*, 6: 34170.
- 761 Sommer, U. (2008). Trophic cascades in marine and freshwater plankton. *International Review of*  
762 *Hydrobiology*, 93: 506–516.
- 763 Sommer, U. et al. (2012). Beyond the Plankton Ecology Group (PEG) Model: mechanisms driving  
764 plankton succession. *Annual Review of Ecology Evolution and Systematics*, 43: 429–448.
- 765 Stearns, C.S. (1989). Trade-offs in life-history evolution. *Functional Ecology*, 3: 259–268.
- 766 Strauss, S.Y. et al. (2002). Direct and ecological costs of resistance to herbivory. *Trends in Ecology and*  
767 *Evolution*, 17: 278–285.
- 768 Strzepek, R.F. and Harrison, P.J. (2004). Photosynthetic architecture differs in coastal and oceanic  
769 diatoms. *Nature*, 431: 689–692.
- 770 Sunda, W.G. and Hardison, D.R. (2010). Evolutionary tradeoffs among nutrient acquisition, cell size,  
771 and grazing defense in marine phytoplankton promote ecosystem stability. *Marine Ecology Progress*  
772 *Series*, 40: 63–76.
- 773 Thackeray, S.J. (2008). Long-term change in the phenology of spring phytoplankton: species-specific  
774 responses to nutrient enrichment and climatic change. *Functional Ecology*, 96, 523–535.
- 775 Thébault, E. and Loreau, M. (2005). Trophic interactions and the relationship between species diversity  
776 and ecosystem stability. *The American Naturalist*, 166: 95–114.
- 777 Theodosiou, L. et al. (2019). The role of stressors in altering eco-evolutionary dynamics. *Functional*  
778 *Ecology*, 33: 73–83.
- 779 Tirok, K. and Gaedke, U. (2010). Internally driven alternation of functional traits in a multispecies  
780 predator–prey system. *Ecology*, 91: 1748–1762.
- 781 Turner, J.T. (2002). Zooplankton fecal pellets, marine snow and sinking phytoplankton blooms. *Aquatic*  
782 *Microbial Ecology*, 27: 57–102.
- 783 Turner, J.T. (2015). Zooplankton fecal pellets, marine snow, phytodetritus and the ocean’s biological  
784 pump. *Progress in Oceanography*, 130: 205–248.
- 785 Våge, S. et al. (2014). Optimal defense strategies in an idealized microbial food web under trade-off  
786 between competition and defense. *PloS One*, 9: e101415
- 787 Van Donk, E. and Hessen, D.O. (1993). Grazing resistance in nutrient-stressed phytoplankton.  
788 *Oecologia*, 93: 508–511.

- 789 Van Donk, E. et al. (1999). Consumer-induced changes in phytoplankton: inducibility, costs, benefits  
790 and impacts on grazers. In: The ecology and evolution of inducible defenses (eds. Tollrian R. and  
791 Harvell, C.D.). *Princeton University Press*, Princeton, USA, 89–110.
- 792 Van Donk, E. et al. (2011). Induced defences in marine and freshwater phytoplankton: a review.  
793 *Hydrobiologia*, 668: 3–19.
- 794 Verschoor, A.M. et al. (2004). Inducible colony formation within the Scenedesmaceae: adaptive  
795 responses to infochemicals from two different herbivore taxa. *Journal of Phycology*, 40: 808–814.
- 796 Ward, B.A. et al. (2017). The size dependence of phytoplankton growth rates: a trade-off between  
797 nutrient uptake and metabolism. *The American Naturalist*, 189: 170–177.
- 798 Weiss, L. et al. (2012). The taste of predation and the defences of prey. In: Chemical ecology in aquatic  
799 systems (eds. Brönmark, C. and Hansson, L.A.). *Oxford University Press*, Oxford, UK, 111–126.
- 800 Yamamichi, M. and Miner, B.E. (2015). Indirect evolutionary rescue: prey adapts, predator avoids  
801 extinction. *Evolutionary Applications*, 8: 787–795.
- 802 Yamamichi, M. et al. (2011). Comparing the effects of rapid evolution and phenotypic plasticity on  
803 predator-prey dynamics. *American Naturalist*, 178: 287–304.
- 804 Yoshida, T. et al. (2003). Rapid evolution drives ecological dynamics in a predator–prey system. *Nature*,  
805 424: 303–306.
- 806 Yoshida, T. et al. (2004). Evolutionary trade-off between defence against grazing and competitive ability  
807 in a simple unicellular alga, *Chlorella vulgaris*. *Proceedings of the Royal Society B*, 271: 1947–1953.
- 808 Yoshida, T. et al. (2007). Cryptic population dynamics: rapid evolution masks trophic interactions. *PloS*  
809 *Biology*, 5: e235.
- 810 Yoshiyama, K. and Klausmeier, C.A. (2008). Optimal cell size for resource uptake in fluids: a new  
811 facet of resource competition. *The American Naturalist*, 171: 59–70.
